# Supplementary material for: BMI-1 is a potential therapeutic target in diffuse intrinsic pontine glioma
Source: Oncotarget. 2017 May 19;8(38):62962–75. doi: 10.18632/oncotarget.18002 (PMC5609895; doi:10.18632/oncotarget.18002)
Supplement: Supplementary file 1 [file oncotarget-08-62962-s001.pdf]

## BMI-1 is a potential therapeutic target in diffuse intrinsic pontine glioma

### SUPPLEMENTARY MATERIALS

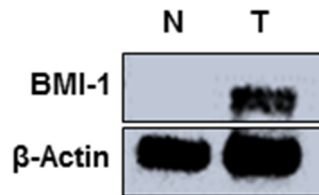

**Supplementary Figure 1: BMI-1 is highly expressed in post-autopsy DIPG tumor tissue from patient with no prior radiation or chemotherapy.** Immunoblot analysis of BMI-1 expression in DIPG tumor PBTR-43. (T), tumor, (N) matched normal.

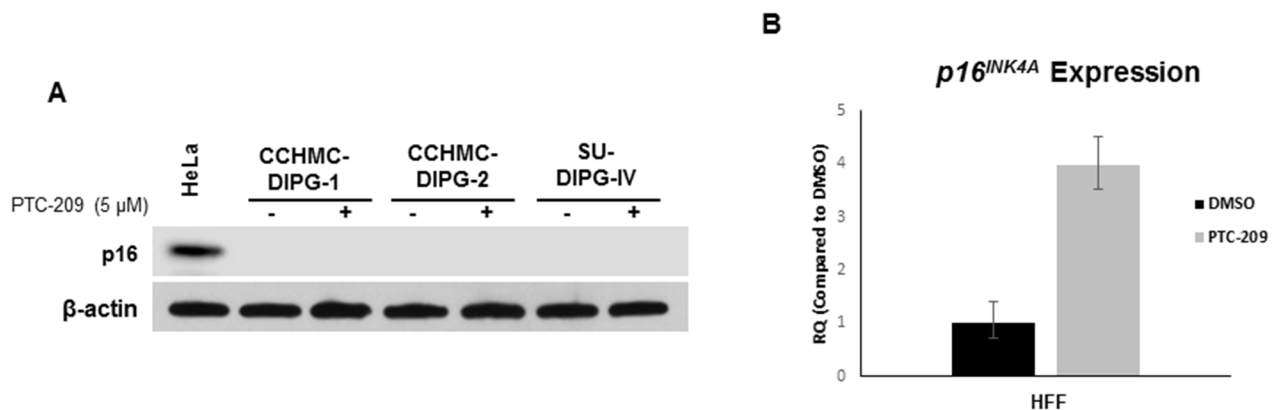

**Supplementary Figure 2: *p16<sup>INK4A</sup>* is not induced upon BMI-1 downregulation in DIPG cells.** (A) Immunoblot analysis of *p16<sup>INK4A</sup>* expression in HeLa cells (positive control) and in DIPG cells treated with 5  $\mu$ M of PTC-209 for 72 hrs. (B) Treatment of normal primary human foreskin fibroblasts (HFF) with 5  $\mu$ M PTC-209 for 72 hrs induced *p16<sup>INK4A</sup>* expression assessed by qPCR. Error bars represent the standard deviation from two independent experiments performed in triplicates.

**Supplementary Table 1: Anatomic locations of the matched normal tissue from DIPG patients (PBTR)**

| Patients | Matched normal tissue location |
|----------|--------------------------------|
| PBTR-15  | Frontal cortex                 |
| PBTR-18  | Frontal cortex                 |
| PBTR-22  | Right frontal lobe             |
| PBTR-23  | Right cerebellum               |
| PBTR-37  | Left frontal lobe              |
| PBTR-38  | Right frontal lobe             |
| PBTR-43  | Right frontal lobe             |

**Supplementary Table 2: IC<sub>50</sub> (μM) values of PTC-209 in DIPG cell lines**

| Cell Lines   | IC <sub>50</sub> (μM) |
|--------------|-----------------------|
| CCHMC-DIPG-1 | 3.996                 |
| SU-DIPG-XXI  | 1.927                 |
| SU-DIPG-IV   | 4.505                 |
| SU-DIPG-XIII | 1.820                 |
| CCHMC-DIPG-2 | 2.551                 |
